# Supplementary material for: Prognostic Influence of Preoperative Mammographic Breast Density in Operable Invasive Female Breast Cancer
Source: PubMed Central journal article supplement (PMC6207781; doi:10.1038/s41598-018-34297-8), 2018-10-30
Supplement: 41598_2018_34297_MOESM1_ESM.pdf [file 41598_2018_34297_MOESM1_ESM.pdf]

# **Prognostic Influence of Preoperative Mammographic Breast Density in Operable Invasive Female Breast Cancer**

**Ki-Tae Hwang<sup>1,\*+</sup>, A Jung Chu<sup>2,+</sup>, Jongjin Kim<sup>1</sup>, Jong Yoon Lee<sup>2</sup>, Ji Hyun Chang<sup>3</sup>, Sohee Oh<sup>4</sup>, Young A Kim<sup>5</sup>, Jiwoong Jung<sup>6</sup> & Bumjo Oh<sup>7</sup>**

<sup>1</sup>Department of Surgery, Seoul Metropolitan Government Seoul National University Boramae Medical Center, Seoul, Republic of Korea

<sup>2</sup>Department of Radiology, Seoul Metropolitan Government Seoul National University Boramae Medical Center, Seoul, Republic of Korea

<sup>3</sup>Department of Radiation Oncology, Seoul Metropolitan Government Seoul National University Boramae Medical Center, Seoul, Republic of Korea

<sup>4</sup>Department of Biostatistics, Seoul Metropolitan Government Seoul National University Boramae Medical Center, Seoul, Republic of Korea

<sup>5</sup>Department of Pathology, Seoul Metropolitan Government Seoul National University Boramae Medical Center, Seoul, Republic of Korea

<sup>6</sup>Department of Surgery, Seoul Medical Center, Seoul, Republic of Korea

<sup>7</sup>Department of Family Medicine, Seoul Metropolitan Government Seoul National University Boramae Medical Center, Seoul, Republic of Korea

**+ Ki-Tae Hwang and A Jung Chu contributed equally to this work.**

**Table S1.** Clinicopathologic characteristics according to mammographic breast density in patients with age  $\leq 50$  years and in patients with age  $> 50$  years.

| Characteristics          | Mammographic Breast Density (Age $\leq 50$ Years) |       |                |       |                |        | Mammographic Breast Density (Age $> 50$ Years) |       |                |       |                |        | <i>P</i> <sup>a)</sup> |
|--------------------------|---------------------------------------------------|-------|----------------|-------|----------------|--------|------------------------------------------------|-------|----------------|-------|----------------|--------|------------------------|
|                          | Low                                               |       | High           |       | Sum            |        | Low                                            |       | High           |       | Sum            |        |                        |
|                          | No.                                               | %     | No.            | %     | No.            | %      | No.                                            | %     | No.            | %     | No.            | %      |                        |
| All                      | 73                                                | 17.6% | 341            | 82.4% | 414            | 100.0% | 356                                            | 64.4% | 197            | 35.6% | 553            | 100.0% |                        |
| Mean age (years)         | 44.2 $\pm$ 5.0                                    |       | 42.6 $\pm$ 5.5 |       | 42.9 $\pm$ 5.4 |        | 65.3 $\pm$ 8.3                                 |       | 58.2 $\pm$ 7.0 |       | 62.8 $\pm$ 8.5 |        | <0.001                 |
| Tumor size (cm)          |                                                   |       |                |       |                |        |                                                |       |                |       |                |        | 0.697                  |
| $\leq 2$                 | 32                                                | 43.8% | 158            | 46.3% | 190            | 45.9%  | 169                                            | 47.6% | 110            | 55.8% | 279            | 50.5%  |                        |
| $> 2$                    | 41                                                | 56.2% | 183            | 53.7% | 224            | 54.1%  | 186                                            | 52.4% | 87             | 44.2% | 273            | 49.5%  |                        |
| Nodal positivity         |                                                   |       |                |       |                |        |                                                |       |                |       |                |        | 0.024                  |
| Negative                 | 36                                                | 50.0% | 219            | 64.2% | 255            | 61.7%  | 237                                            | 66.6% | 128            | 65.0% | 365            | 66.0%  |                        |
| Positive                 | 36                                                | 50.0% | 122            | 35.8% | 158            | 38.3%  | 119                                            | 33.4% | 69             | 35.0% | 188            | 34.0%  |                        |
| Stage                    |                                                   |       |                |       |                |        |                                                |       |                |       |                |        | 0.157                  |
| Stage I                  | 21                                                | 28.8% | 128            | 37.5% | 149            | 36.0%  | 142                                            | 40.0% | 89             | 45.2% | 231            | 41.8%  |                        |
| Stage II, III            | 52                                                | 71.2% | 213            | 62.5% | 265            | 64.0%  | 213                                            | 60.0% | 108            | 54.8% | 321            | 58.2%  |                        |
| Hormonal receptor        |                                                   |       |                |       |                |        |                                                |       |                |       |                |        | 0.322                  |
| Negative                 | 15                                                | 22.7% | 59             | 17.6% | 74             | 18.4%  | 101                                            | 28.5% | 54             | 27.6% | 155            | 28.1%  |                        |
| Positive                 | 51                                                | 77.3% | 277            | 82.4% | 328            | 81.6%  | 254                                            | 71.5% | 142            | 72.4% | 396            | 71.9%  |                        |
| Estrogen receptor        |                                                   |       |                |       |                |        |                                                |       |                |       |                |        | 0.039                  |
| Negative                 | 23                                                | 34.8% | 77             | 22.8% | 100            | 24.8%  | 112                                            | 31.5% | 65             | 33.2% | 177            | 32.1%  |                        |
| Positive                 | 43                                                | 65.2% | 260            | 77.2% | 303            | 75.2%  | 243                                            | 68.5% | 131            | 66.8% | 374            | 67.9%  |                        |
| Progesterone receptor    |                                                   |       |                |       |                |        |                                                |       |                |       |                |        | 0.136                  |
| Negative                 | 23                                                | 34.8% | 87             | 25.9% | 110            | 27.4%  | 152                                            | 42.8% | 84             | 42.9% | 236            | 42.8%  |                        |
| Positive                 | 43                                                | 65.2% | 249            | 74.1% | 292            | 72.6%  | 203                                            | 57.2% | 112            | 57.1% | 315            | 57.2%  |                        |
| HER2                     |                                                   |       |                |       |                |        |                                                |       |                |       |                |        | 0.290                  |
| Negative                 | 49                                                | 81.7% | 232            | 75.3% | 281            | 76.4%  | 257                                            | 77.4% | 133            | 74.3% | 390            | 76.3%  |                        |
| Positive                 | 11                                                | 18.3% | 76             | 24.7% | 87             | 23.6%  | 75                                             | 22.6% | 46             | 25.7% | 121            | 23.7%  |                        |
| Histologic grade         |                                                   |       |                |       |                |        |                                                |       |                |       |                |        | 0.592                  |
| 1,2                      | 39                                                | 60.9% | 205            | 64.5% | 244            | 63.9%  | 198                                            | 59.3% | 120            | 62.5% | 318            | 60.5%  |                        |
| 3                        | 25                                                | 39.1% | 113            | 35.5% | 138            | 36.1%  | 136                                            | 40.7% | 72             | 37.5% | 208            | 39.5%  |                        |
| Lymphovascular invasion  |                                                   |       |                |       |                |        |                                                |       |                |       |                |        | 0.178                  |
| Negative                 | 30                                                | 51.7% | 180            | 61.2% | 210            | 59.7%  | 227                                            | 69.0% | 121            | 66.1% | 348            | 68.0%  |                        |
| Positive                 | 28                                                | 48.3% | 114            | 38.8% | 142            | 40.3%  | 102                                            | 31.0% | 62             | 33.9% | 164            | 32.0%  |                        |
| BMI (kg/m <sup>2</sup> ) |                                                   |       |                |       |                |        |                                                |       |                |       |                |        | <0.001                 |
| $\leq 25$                | 35                                                | 47.9% | 266            | 78.0% | 301            | 72.7%  | 164                                            | 46.1% | 131            | 66.8% | 295            | 53.4%  |                        |
| $> 25$                   | 38                                                | 52.1% | 75             | 22.0% | 113            | 27.3%  | 192                                            | 53.9% | 65             | 33.2% | 257            | 46.6%  |                        |
| Operation                |                                                   |       |                |       |                |        |                                                |       |                |       |                |        | 0.674                  |
| Lumpectomy               | 31                                                | 42.5% | 154            | 45.2% | 185            | 44.7%  | 134                                            | 37.6% | 85             | 43.1% | 219            | 39.6%  |                        |
| Mastectomy               | 42                                                | 57.5% | 187            | 54.8% | 229            | 55.3%  | 222                                            | 62.4% | 112            | 56.9% | 334            | 60.4%  |                        |
| Radiation therapy        |                                                   |       |                |       |                |        |                                                |       |                |       |                |        | 0.356                  |
| No                       | 36                                                | 49.3% | 148            | 43.4% | 184            | 44.4%  | 201                                            | 56.5% | 111            | 56.3% | 312            | 56.4%  |                        |
| Yes                      | 37                                                | 50.7% | 193            | 56.6% | 230            | 55.6%  | 155                                            | 43.5% | 86             | 43.7% | 241            | 43.6%  |                        |
| Chemotherapy             |                                                   |       |                |       |                |        |                                                |       |                |       |                |        | 0.982                  |
| No                       | 14                                                | 19.2% | 65             | 19.1% | 79             | 19.1%  | 135                                            | 37.9% | 60             | 30.5% | 195            | 35.3%  |                        |
| Yes                      | 59                                                | 80.8% | 276            | 80.9% | 335            | 80.9%  | 221                                            | 62.1% | 137            | 69.5% | 358            | 64.7%  |                        |
| Herceptin therapy        |                                                   |       |                |       |                |        |                                                |       |                |       |                |        | 0.504                  |
| No                       | 67                                                | 91.8% | 304            | 89.1% | 371            | 89.6%  | 318                                            | 89.3% | 179            | 90.9% | 497            | 89.9%  |                        |
| Yes                      | 6                                                 | 8.2%  | 37             | 10.9% | 43             | 10.4%  | 38                                             | 10.7% | 18             | 9.1%  | 56             | 10.1%  |                        |
| Endocrine therapy        |                                                   |       |                |       |                |        |                                                |       |                |       |                |        | 0.026                  |
| No                       | 23                                                | 31.5% | 67             | 19.6% | 90             | 21.7%  | 101                                            | 28.4% | 61             | 31.0% | 162            | 29.3%  |                        |
| Yes                      | 50                                                | 68.5% | 274            | 80.4% | 324            | 78.3%  | 255                                            | 71.6% | 136            | 69.0% | 391            | 70.7%  |                        |

Abbreviations: BMI, body mass index; HER2, human epidermal growth factor receptor 2.

<sup>a)</sup>*P* value for mean age was calculated by *t*-test and all the other *p* values were calculated by  $\chi^2$  test.

**Table S2.** Multivariable analysis in patients with age >50 years in terms of overall survival.

| Characteristics (Age>50)                      | HR    | 95% CI |       | <i>p</i> |
|-----------------------------------------------|-------|--------|-------|----------|
| Mammographic breast density, high vs low      | 0.399 | 0.181  | 0.881 | 0.023    |
| Tumor size (cm), >2 vs ≤2                     | 2.226 | 1.016  | 4.876 | 0.045    |
| Nodal positivity, positive vs negative        | 1.413 | 0.630  | 3.171 | 0.402    |
| Estrogen receptor, positive vs negative       | 0.476 | 0.190  | 1.192 | 0.113    |
| Progesterone receptor, positive vs negative   | 1.417 | 0.539  | 3.725 | 0.480    |
| HER2, positive vs negative                    | 1.162 | 0.554  | 2.434 | 0.691    |
| Histologic grade, 3 vs 1,2                    | 1.491 | 0.723  | 3.077 | 0.279    |
| Lymphovascular invasion, positive vs negative | 1.641 | 0.723  | 3.724 | 0.237    |
| BMI (kg/m <sup>2</sup> ), >25 vs ≤25          | 0.984 | 0.541  | 1.788 | 0.957    |
| Operation, mastectomy vs lumpectomy           | 2.994 | 1.059  | 8.466 | 0.039    |
| Radiation therapy, yes vs no                  | 1.942 | 0.847  | 4.451 | 0.117    |
| Chemotherapy, yes vs no                       | 0.136 | 0.067  | 0.276 | <0.001   |
| Herceptin therapy, yes vs no                  | 0.322 | 0.038  | 2.742 | 0.300    |
| Endocrine therapy, yes vs no                  | 0.943 | 0.302  | 2.944 | 0.919    |

Abbreviations: BMI, body mass index; CI, confidence interval; HR, hazard ratio.

**Table S3.** Detailed regional recurrence rates and incidence rates of contralateral breast cancer according to mammographic breast density.

| Follow-up<br>Months | Regional Recurrence |                        |       |                     |                        |      | Contralateral Breast Cancer |                        |      |                     |                        |      |
|---------------------|---------------------|------------------------|-------|---------------------|------------------------|------|-----------------------------|------------------------|------|---------------------|------------------------|------|
|                     | Low Breast Density  |                        |       | High Breast Density |                        |      | Low Breast Density          |                        |      | High Breast Density |                        |      |
|                     | Subject No          | Event No <sup>a)</sup> | Rate  | Subject No          | Event No <sup>a)</sup> | Rate | Subject No                  | Event No <sup>a)</sup> | Rate | Subject No          | Event No <sup>a)</sup> | Rate |
| 60 months           | 425                 | 14                     | 4.0%  | 535                 | 10                     | 2.8% | 425                         | 1                      | 0.2% | 535                 | 8                      | 2.6% |
| 120 months          | 146                 | 20                     | 10.1% | 200                 | 11                     | 3.9% | 148                         | 2                      | 1.4% | 197                 | 11                     | 5.3% |
| 180 months          | 36                  | 20                     | 10.1% | 56                  | 11                     | 3.9% | 38                          | 2                      | 1.4% | 56                  | 12                     | 8.2% |
| 240 months          | 9                   | 20                     | 10.1% | 8                   | 11                     | 3.9% | 9                           | 2                      | 1.4% | 7                   | 12                     | 8.2% |

<sup>a)</sup>Cumulative number of events.

**Figure S1.** Curves for breast cancer recurrence and contralateral breast cancer development according to mammographic breast density in all subjects. Local recurrence (A), regional recurrence (B), distant recurrence (C), and contralateral breast cancer development (D).

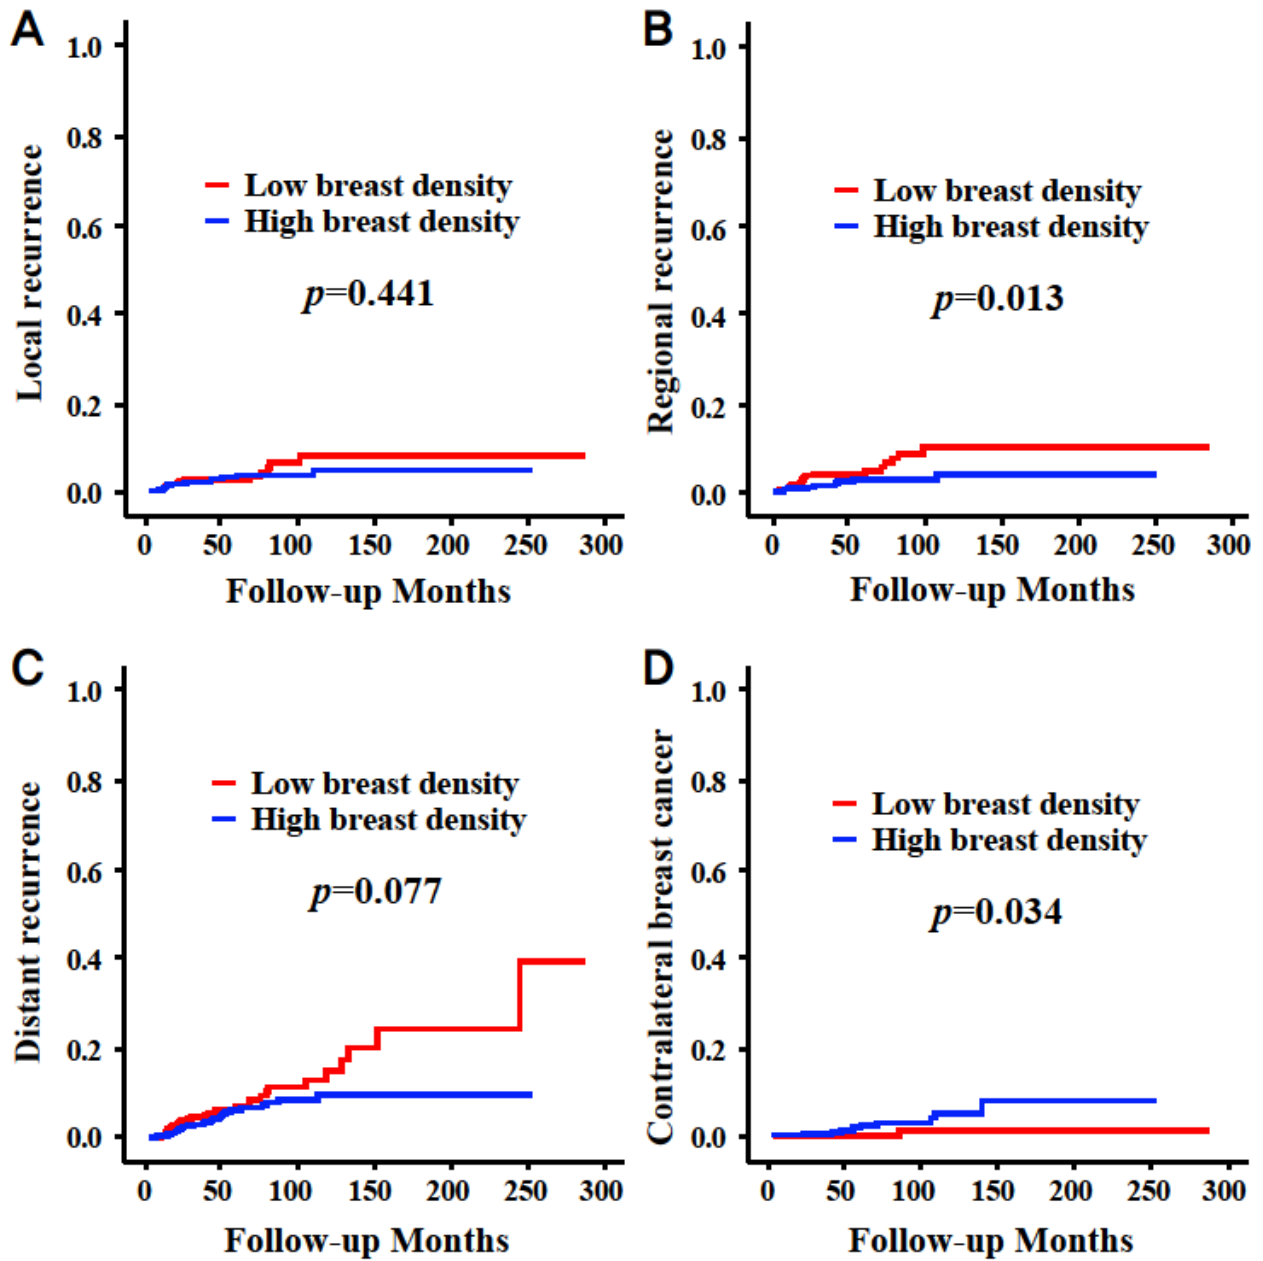

**Figure S2.** Box plots showing the relationships between mammographic breast density and age. Box plots for 4 categories of mammographic breast density in all subjects (A), in patients with age  $\leq 50$  years (C), and in patients with age  $> 50$  years (E). Box plots for high or low mammographic breast density in all subjects (B), in patients with age  $\leq 50$  years (D), and in patients with age  $> 50$  years (F).

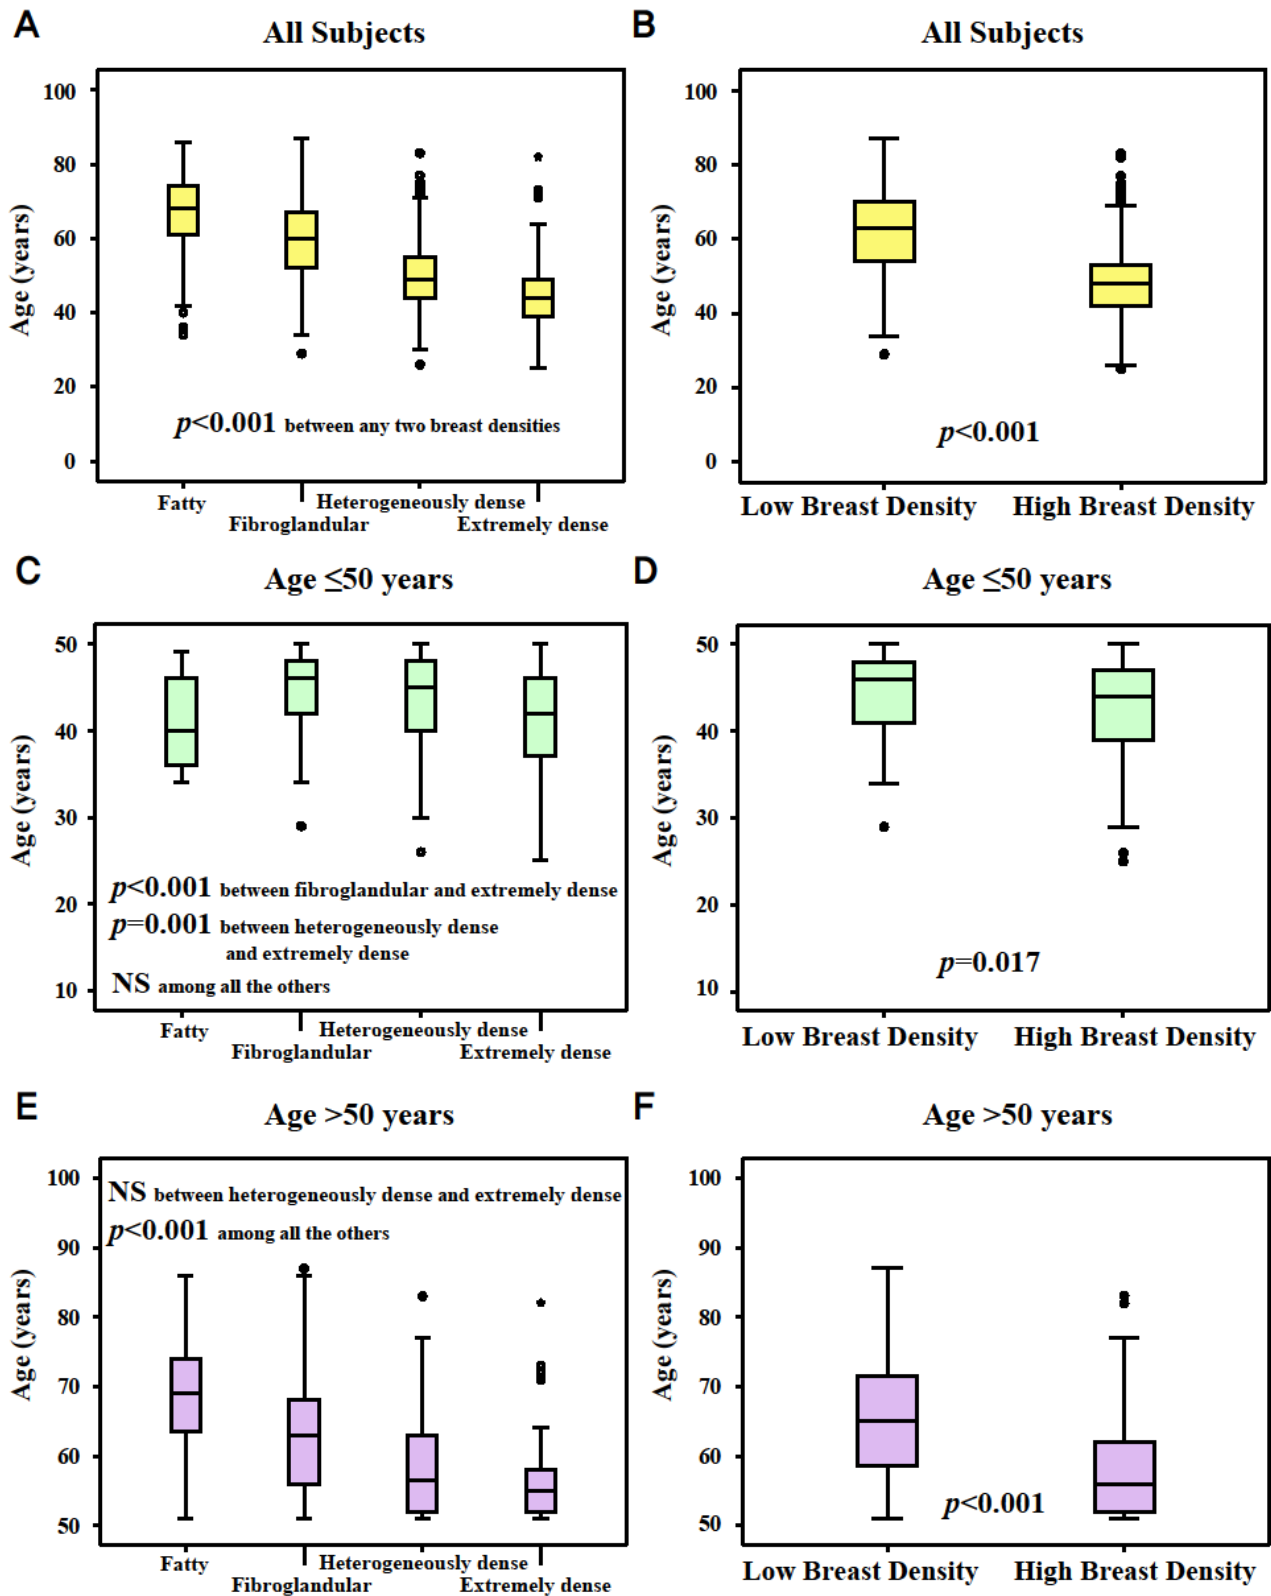

Abbreviations: NS, not significant.
